# Supplementary material
Source: HighWire-hosted journal article supplement (https://heart.bmj.com/content/104/21/1783)
Supplement: inline-supplementary-material-1 [file inline-supplementary-material-1.docx]

| **Study** | **Variable** | | | | | | | | | | | | | |
| --- | --- | --- | --- | --- | --- | --- | --- | --- | --- | --- | --- | --- | --- | --- |
| **Patients (n)** | | **Age (years)** | | **Male % (n)** | | **LVEF %** | | **LVEDD (mm)** | | **AF % (n)** | | **ICM % (n)** | |
| A | B | A | B | A | B | A | B | A | B | A | B | A | B |
| **[20]** | 60 | 30 | 61±12 | 66±10 | 83(50) | 57(17) | 29±9 | 45±12 | 68±6 | 56±7 | 15(9) | 23(7) | 100(60) | 100(30) |
| **[21]** | 136 | 50 | 62±9 | 61±9 | 74(101) | 74(37) | 42±8 | 40±8 | 62±5 | 58±5 | n.a. | n.a. | 100(136) | 100(50) |
| **[14]** | 115 | 50 | 52±13 | 61±9 | 56(64) | 74(37) | 43±6 | 40±8 | 59±12 | 58±5 | 5(6) | 17(9) | 100(115) | 100(50) |
| **[22]** | 31 | 69 | 48±12 | 47±15 | 55(17) | 64(44) | 28±3 | 29±3 | n.a. | n.a. | n.a. | n.a. | 77(24) | 68(47) |
| **[23]** | 37 | 50 | 56 | 61±9 | n.a. | n.a. | 30±6 | 40±8 | 70±0 | 58±5 | n.a. | n.a. | 100(37) | 100(50) |
| **[15]** | 30 | 30 | 68±11 | 70±6 | 63(19) | 67(20) | 37±14 | 41±15 | 62±7 | 55±9 | 33(10) | 40(12) | 100(30) | 100(30) |
| **[17]** | 44 | 50 | 63±8 | 61±9 | 61(27) | 74(37) | 33±16 | 40±8 | 57±7 | 58±5 | n.a. | n.a. | 100(44) | 100(50) |
| **[16]** | 43 | 49 | 66±8 | 63±8 | 62(27) | 71(35) | 33±11 | 44±15 | 56±10 | 53±8 | n.a. | n.a. | 100(43) | 100(49) |
| **[24]** | 55 | 55 | 62±12 | 62±8 | 58(32) | 62(34) | 42±8 | 42±5 | 58±8 | 58±2 | 5(3) | 7(4) | 100(55) | 100(55) |
| **[25]** | 75 | 50 | 65±10 | 61±9 | 68(51) | 74(37) | 33 | 40±8 | n.a. | n.a. | n.a. | n.a. | 100(75) | 100(50) |
| **[26]** | 69 | 69 | 63±11 | 62±9 | 57(39) | 59(41) | 43±8 | 43±5 | 57±8 | 56±2 | 7(5) | 10(7) | 100(69) | 100(69) |
| **[27]** | 48 | 48 | 63±7 | 65±7 | 58(28) | 63(30) | 35±5 | 37±4 | 63±3 | 61±4 | 19(9) | 21(10) | 100(48) | 100(48) |

A = Study group // B = Control group
